# 1 **Interpretation of southern hemisphere**

## 2 **humpback whale diet via stable isotopes;**

### 3 **implications of tissue-specific analysis**

4 June Eggebo\*<sup>a</sup>, Jasmin Groß <sup>a</sup> and Susan Bengtson Nash <sup>a</sup>

5

6 <sup>a</sup> Southern Ocean Persistent Organic Pollutants Program, Centre for Planetary Health and

7 Food Security, School of Environment and Science, Griffith University, Nathan, QLD 4111, Australia

8

9 Corresponding author:

10 s.bengtsonnash@griffith.edu.au

11

12

13

14 *Keywords:* Blubber, Foraging ecology, Lipids, Sentinel parameter, Skin, Trophic biology

15

16

17

18

19

20

21

22

## 23 Abstract

24 Blubber and skin are commonly used tissues in stable isotope analysis for the purpose of investigating  
25 cetacean diet. Critical comparison of tissue-specific isotopic signals is, however, lacking resulting in  
26 uncertainty surrounding the representativeness and therefore utility of different tissues for accurate  
27 determination of recent foraging. This study used remotely biopsied blubber and skin tissues from  
28 southern hemisphere humpback whales for strategic comparison of  $\delta^{13}\text{C}$  and  $\delta^{15}\text{N}$  values. Samples were  
29 collected 2008-2018 as part of long-term monitoring under the Humpback Whale Sentinel Program.  
30 Blubber tissues were lipid-extracted prior to analysis, whilst mathematical lipid-correction was  
31 performed on skin samples. Isotopic values from paired blubber and skin samples from the same  
32 individuals were compared to assess whether tissues could be used interchangeably for isotope analysis  
33 and dietary interpretation. Significant differences were observed for both  $\delta^{13}\text{C}$  and  $\delta^{15}\text{N}$ , flagging  
34 previously undocumented methodological considerations, and the need for method validation and  
35 standardisation in application of these approaches. This study therefore advances methodological aspects  
36 of cetacean dietary analysis. This is of elevated importance in the context of rapidly changing ocean  
37 ecosystems.

38

39

40

## 41 **1. Introduction**

42 Southern hemisphere humpback whales (*Megaptera novaeangliae*; SHHWs) have been implemented as  
43 a sentinel species for the circumpolar surveillance of pollution and climate change in the Southern Ocean  
44 (1,2). As capital breeders, these populations rely on intensive summer feeding on Antarctic krill  
45 (*Euphausia superba*; hereafter ‘krill’; Groß et al., 2021; Waugh et al., 2012), to sustain their annual  
46 winter migrations to lower latitudes for breeding and calving. The narrow foraging niche of SHHWs,  
47 results in a distilled connection between ecosystem productivity and energetic provisioning (both prey  
48 type and foraging success; Castrillon and Bengtson Nash, 2020). Their ecophysiology thus renders these  
49 populations powerful indicators of ecosystem productivity and change.

50 Krill are a sympagic species, with sea-ice providing feeding habitat and refuge for early life stages (6,7).  
51 Polar ecosystems are undergoing rapid change, manifesting in sea-ice melt (8), ocean acidification (9),  
52 and a rise in sea water temperature (10). These physio-chemical characteristics of the krill ecosystem, in  
53 turn, impact krill recruitment and survival (11,12). Any change in the abundance or availability of krill  
54 is expected to carry significant implications for krill consumers (Tulloch et al 2019, Seyboth et al. 2016).  
55 Humpback whale (HW) populations globally show a high degree of plasticity in both their target prey  
56 and foraging behaviour (13,14). As such, SHHWs may be expected to respond to a change in krill  
57 availability through diversified foraging, including changes to both prey and foraging range.  
58 Longitudinal monitoring of SHHW diet has therefore been identified as a core sentinel parameter under  
59 the Humpback Whale Sentinel Program (HWSP), with interannual variation and drift assumed to reflect  
60 a change in krill availability.

61  
62 Ecologists use bulk stable isotope analysis (BSIA) to directly identify and trace elemental cycling in the  
63 biosphere (Fry, 2008). Over the last few decades, BSIA has played a significant role in research  
64 involving animal migration (15,16), diet (17,18), reproduction (19,20) and food web connectivity

65 (21,22). The stable isotopes of carbon ( $^{13}\text{C}$ ,  $^{12}\text{C}$ ) and nitrogen ( $^{15}\text{N}$ ,  $^{14}\text{N}$ ) have, in particular, become  
66 valuable in diet research of marine mammals (23–26). The use of stable isotope analysis to investigate  
67 the structure of food webs is based on two assumptions: namely that the isotopic composition of  
68 consumer tissue reflects the isotopic composition of their diet, and that consumers are slightly enriched  
69 in  $^{15}\text{N}$  and to a lesser extent in  $^{13}\text{C}$  compared to their food (27,28). The phenomenon is called ‘trophic  
70 discrimination’, also referred to as ‘trophic fractionation’ and averages 0.5-1.0 ‰ for carbon ( $\Delta^{13}\text{C}$ ;  
71 DeNiro and Epstein, 1978; Fry, 2008; Zuev et al., 2019) and 2-4 ‰ for nitrogen ( $\Delta^{15}\text{N}$ ; Minagawa and  
72 Wada, 1984; Fry, 2008; Zuev et al., 2019). Trophic levels (TLs) are a hierarchical way of classifying  
73 organisms according to their theoretical feeding relationships within an ecosystem (32). Nitrogen  
74 isotopes ( $\delta^{15}\text{N}$ ) increase as a function of mean TL (Minagawa and Wada, 1984) due to the relatively  
75 faster metabolic loss of  $^{14}\text{N}$  compared to  $^{15}\text{N}$  leaving animals at higher trophic levels with higher  $\delta^{15}\text{N}$   
76 values (Fry, 2008). Carbon isotopes ( $\delta^{13}\text{C}$ ) in marine environments can be traced from producers such  
77 as particulate organic matter (POM) and phytoplankton, to consumers to determine primary carbon  
78 sources (27,33). These values are often used to distinguish between two geographically distinct food  
79 webs. Altabet and Francois (1994) demonstrated that surface water  $\delta^{13}\text{C}$  values of POM lay at  
80 approximately -22 ‰ in temperate latitudes but decrease to -25 ‰, sometimes down to -35 ‰ (35) closer  
81 to Antarctica. Thus, animals feeding in Antarctic food webs demonstrate correspondingly low carbon  
82 isotope values (36–39), compared to those feeding temperate food webs (40,41).

83 The interpretation of bulk stable isotope (BSI) signals is, however, not without uncertainty. In addition  
84 to the prey type and foraging range, the trophic position (TP) is known to be influenced by endogenous  
85 factors such as nutritional stress, metabolic activity of tissues, diet quality, body size, excretory  
86 mechanisms and feeding rate (42–46). Further, the isotopic signals associated with tissues of different  
87 biomolecular composition (i.e. lipids, carbohydrates, proteins) have frequently been recorded (30,46,47).  
88 The extent to which tissue types within an individual differ in their  $\delta^{15}\text{N}$  and  $\delta^{13}\text{C}$  values thus carries

89 inherent uncertainty for robust quantification of diet and represents a methodological aspect of cetacean  
90 dietary investigation that has not been thoroughly addressed.

91 In cetacean research, blubber and skin tissue are the most commonly used tissue types for dietary  
92 investigation as they are metabolically active and can easily be obtained via non-lethal biopsies from  
93 healthy, free-swimming individuals (48,49). Marine mammal blubber is principally composed of lipids  
94 and contains small amounts of protein (46,50). By contrast, skin mainly contains protein and a limited  
95 amount of lipids (46,51,52). In BSIA, lipids confound analyses by decreasing the tissue  $^{13}\text{C}/^{12}\text{C}$  and  
96 hence lowering measured  $\delta^{13}\text{C}$  values (30). As such, the influence of lipid content on whole tissue  $\delta^{13}\text{C}$   
97 values, and following dietary interpretation must be accounted for (53). Two approaches are commonly  
98 used to account for lipids. The first method is the physical removal of lipid fractions through solvent  
99 extraction prior to BSIA. Alternatively, where the relationship between lipid-containing and lipid-  
100 depleted tissues of a species is known, mathematical corrections have been developed and applied (Post  
101 et al., 2007; Ryan et al., 2012, Groß et al. 2021).

102 In an effort to further strengthen data obtained from long-term monitoring of SHHW diet, the current  
103 study sought to compare the BSI measurements obtained from lipid-adjusted blubber and skin tissues  
104 respectively. In order to test the hypothesis that  $\delta^{13}\text{C}$  and  $\delta^{15}\text{N}$  values of blubber and skin taken from the  
105 same individual could be used interchangeably, 171 paired samples were investigated, providing new  
106 insights into method application, data interpretations, and species physiology.

## 107 **2. Material and methods**

### 108 *2.1 Sample Collection*

109 Blubber and skin biopsy samples were obtained for long-term monitoring under the HWSP from free-  
110 swimming SHHW of the east coast of Australia-migrating stock (E1 as defined by the International  
111 Whaling Commission; Acevedo et al., 2013), between 2008 and 2018. The biopsies were collected off  
112 North Stradbroke Island, southeast Queensland, Australia (approximately 27°26 S, 153°34 E) during

113 the annual northward (June/ July) and southward (September/ October) migration according to  
114 methods described by Bengtson Nash et al. (2018). The collection of samples was carried out under  
115 Scientific Purposes permit, granted by the QLD department of Environment and Heritage Protection  
116 and animal ethics permit granted by the Griffith University Animal Ethics Committee. In total, 171  
117 paired blubber and skin biopsy samples were included in this study. Blubber tissue was lipid extracted  
118 with solvents prior to analysis while skin tissue was mathematically lipid corrected. Both are referred  
119 to as “lipid-adjusted” in subsequent text.

## 120 2.2 Lipid Adjustment

### 121 2.2.1 Solvent Extraction

122 Approximately 30 mg of blubber was lipid extracted prior to BSIA. The solvent lipid extraction of  
123 blubber tissue was completed using a modified methanol-dichloromethane-water (2:1:0.8 v/v/v  
124 MeOH/CH<sub>2</sub>Cl<sub>2</sub>/H<sub>2</sub>O) method pioneered by Bligh and Dyer (1959), as described in detail elsewhere  
125 (e.g. Groß et al., 2021).

### 126 2.2.2 Mathematical Correction

127 Previously, Groß et al. (2021) determined the most appropriate isotopic discrimination factor of skin  
128 for the study population to be 8.92 ‰. The mass balance approach (MBA) developed by Fry (2002),  
129 was considered the best fit for lipid correction of SHHW skin, and was therefore applied in the current  
130 study. The correction applied in this study was as follows (Eq. 1):

$$131 \delta^{13}\text{C}_{\text{LFM}} = \delta^{13}\text{C}_{\text{B}} + D \times \left(1 - \frac{\text{C:N}_{\text{LF}}}{\text{C:N}_{\text{B}}}\right) \quad (1)$$

132 Where  $\delta^{13}\text{C}_{\text{LFM}}$  is the lipid-free (or lipid-corrected) carbon isotope value of skin,  $\delta^{13}\text{C}_{\text{B}}$  is the bulk  
133 carbon isotope value measured from Balaenopteridae skin, and D is the isotopic discrimination factor.  
134 C: N<sub>LF</sub> is the measured ratio of lipid-free skin tissue, whilst C: N<sub>B</sub> is the measured ratio of bulk  
135 Balaenoptera skin tissue.

### 136 2.3 Bulk Stable Isotope Analysis

137 Lipid-adjusted blubber and skin tissue were oven dried overnight at approximately 58°C and  
138 pulverized in to 1-2 mg samples which were placed into tin capsules for  $\delta^{13}\text{C}$  and  $\delta^{15}\text{N}$  analysis. Stable  
139 isotope abundances were calculated in permil using the following equation:

$$140 \delta X = [(R \text{ sample} / R \text{ standard}) - 1] \times 1000 \quad (2)$$

141 Where, X is  $^{13}\text{C}$  or  $^{15}\text{N}$ , and R is the respective ratio  $^{13}\text{C}/^{12}\text{C}$  or  $^{15}\text{N}/^{14}\text{N}$ . The international reference  
142 standards used for carbon and nitrogen are, respectively, Vienna Pee Dee Belemnite and  $\text{N}_2$  in air.  
143 Laboratory standards, sucrose and  $(\text{NH}_4)_2\text{SO}_4$  were calibrated using international standards IAEA- $\text{CH}_6$   
144 for carbon and IAEA N1 for nitrogen. The preparation system used is a Europa EA-GSL interfaced to  
145 a SERCON Hydra 20–20 isotope ratio mass-spectrometer (IRMS). Based on analysis of replicate  
146 standards, the standard deviations for  $\delta^{13}\text{C}$  and  $\delta^{15}\text{N}$  averaged 0.1 ‰ and 0.15 ‰, respectively.

147

148

### 149 2.4 Krill range calculation

150 The krill range i.e., the isotopic range expected for individual whale  $\delta^{13}\text{C}$  and  $\delta^{15}\text{N}$  values feeding  
151 exclusively on Antarctic krill, was calculated based on isotopic values of krill derived from  
152 Eisenmann et al. 2016. Blubber and skin trophic fractionation (TF) estimates were calculated in this  
153 study (Table S1, Table S2). The krill range for lipid-extracted blubber was -28.14 to -24.66 and 5.96  
154 to 9.34, while for lipid-corrected skin the range was -27.09 to -23.61 and 5.12 to 8.50 respectively for  
155  $\delta^{13}\text{C}$  and  $\delta^{15}\text{N}$ . This facilitated comparison of blubber and skin foraging results, allowing for an inter-  
156 annual evaluation of diet representation within and between tissues throughout sample years.

### 157 2.5 Trophic position calculation

158 Trophic position for SHHWs was calculated from lipid-adjusted blubber and skin tissues, relative to  
159 krill using the following equation:

$$160 \text{ TP} = 2 + (\delta^{15}\text{N}_T - \delta^{15}\text{N}_A) / \Delta^{15}\text{N}_T \quad (3)$$

161 Where, 2 is the TP of the primary consumer, T is tissue type (lipid-extracted blubber or lipid-corrected  
162 skin), A is Antarctic krill (prey) and  $\Delta^{15}\text{N}$  is the TF value. Mean lipid-corrected skin and lipid-  
163 extracted blubber  $\delta^{15}\text{N}$  isotope values were derived from BSIA in this study, the mean Antarctic krill  
164  $\delta^{15}\text{N}$  value of 3.2 ‰ was derived from literature estimates as shown in Table S1.1, and TF values for  
165 lipid-extracted blubber (4.45 ‰) and lipid-corrected skin (3.61 ‰) were calculated as shown in Table  
166 S1.2.

### 167 2.6 Statistics

168 Data analyses were performed in R version 1.3. 1093 (61) and GraphPad Prism version 9.0.2 (62). A  
169 Shapiro-Wilk test and a Levene's test were used to test the data for normality and homogeneity of  
170 variance, respectively. All statistical results were interpreted using a significance level of  $\alpha = 0.05$ . The  
171  $\delta^{13}\text{C}$  and  $\delta^{15}\text{N}$  isotopic values across sex and migration showed no significant difference ( $p=0.1841$   
172 and  $p=0.1184$  respectively), thus all samples were treated as a homogenous cohort. A Shapiro-wilks  
173 test demonstrated non-normality for  $\delta^{13}\text{C}$  and  $\delta^{15}\text{N}$  isotopic values within and between lipid-adjusted  
174 blubber and skin, thus non-parametric statistical tests were further applied. Two separate Wilcoxon  
175 matched pair signed rank tests were used to test for differences in  $\delta^{13}\text{C}$  and  $\delta^{15}\text{N}$  values between the  
176 two tissue types. The test structure used  $\delta^{13}\text{C}$  and  $\delta^{15}\text{N}$  as test variables for differences in the factor  
177 'tissue type' with fixed values for lipid-adjusted blubber and skin tissue. A non-parametric Kruskal-  
178 Wallis test with multiple comparisons was applied to investigate trends across sample years for  $\delta^{13}\text{C}$   
179 and  $\delta^{15}\text{N}$  values.

## 180 3.0 Results and Discussion

181 The present study is the first to investigate tissue specific BSI measurements and implications for  
182 interpretation of SHHW diet. Our results showed that there are significant differences in  $\delta^{13}\text{C}$  and  
183  $\delta^{15}\text{N}$  values obtained from lipid-adjusted blubber and skin from the same individuals. Such



184 differences were more prominent in some individuals, thus occasionally led to different down-  
185 stream interpretation of trophic position. There was greater variability in  $\delta^{15}\text{N}$  values of lipid-  
186 extracted blubber compared to lipid-corrected skin. The tissue-specific variation in  $\delta^{15}\text{N}$  values  
187 was surprisingly not reflected in tissue-specific TP estimates as lipid-adjusted blubber and skin  
188 tissue demonstrated a similar TP of 3.0. These findings underscore that tissue-specific variation  
189 must be thoroughly investigated before comparing dietary results obtained via BSIA using two  
190 different tissues and caution against interchangeable use of tissues or comparison between them.

### 191 *3.1 Bulk differences*

192 For both  $\delta^{13}\text{C}$  and  $\delta^{15}\text{N}$  values of lipid-adjusted tissues, significant differences were observed ( $\delta^{13}\text{C}$   
193  $p=0.0001$  and  $\delta^{15}\text{N}$   $p=0.0001$ ; Figure 1). Lipid-extracted blubber values showed greater variability for  
194 both  $\delta^{13}\text{C}$  and  $\delta^{15}\text{N}$  compared to lipid-corrected skin (Table 1., Figure 1).

195 Table 1: Table overview of the mean, standard deviation (SD) and range for  $\delta^{13}\text{C}$  and  $\delta^{15}\text{N}$  values  
 196 for lipid-extracted blubber and lipid-corrected skin tissue of E1 humpback whales (n=171).

| Lipid-free skin |     |        |      |                 | Lipid-extracted blubber |     |        |      |                 |
|-----------------|-----|--------|------|-----------------|-------------------------|-----|--------|------|-----------------|
| Isotope         | n   | Mean   | SD   | Range           | Isotope                 | n   | Mean   | SD   | Range           |
| C               | 171 | -25.35 | 0.60 | -27.35 - -23.52 | C                       | 171 | -26.40 | 1.83 | -31.56 - -20.77 |
| N               | 171 | 6.81   | 0.46 | 5.21 - 8.22     | N                       | 171 | 7.65   | 1.14 | 3.65 - 13.87    |

197

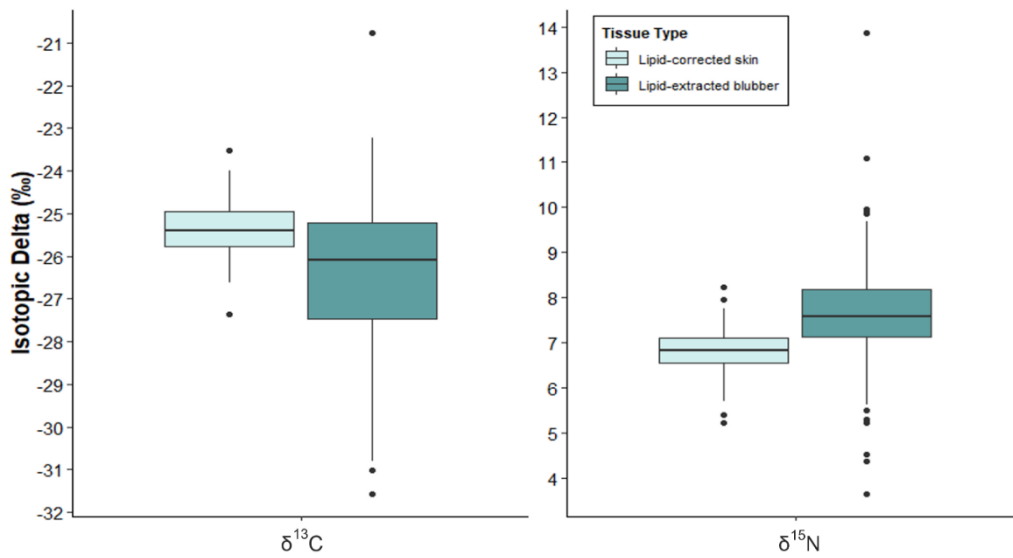

Figure 1: Box plot showing the distribution of  $\delta^{13}\text{C}$  and  $\delta^{15}\text{N}$  values for lipid-extracted blubber and lipid-corrected skin tissue (n=171).

206 As the tissues were obtained from the same individual whale, the extent of the variability in both  
 207 isotope signatures was not expected. There is limited research on the comparison of  $\delta^{13}\text{C}$  and  $\delta^{15}\text{N}$   
 208 values between HW blubber and skin tissue, however, a significant difference between the two  
 209 tissues either for one or both isotopes has been documented (e.g Groß et al., 2021; Todd et al.,  
 210 1997). However, the reasons for this variation are not clear, and thus we attempt to evaluate several  
 211 factors that may have contributed to the significant differences found in this study.

### 212 3.2 Inter-annual differences

213 Large inter-annual variability in isotopic signatures has previously been evidenced via fatty  
 214 acid analysis for this population (Groß et al. 2020). When samples were separated by year,  
 215 limiting analysis to those years where >10 paired samples were available for analysis (2013-

216 2018), significant inter-annual differences were observed in selected years. Of the six within  
217 year cohorts available, three demonstrated a significant difference in the  $\delta^{13}\text{C}$  values between  
218 the two tissue types (2016;  $p=0.0216$ , 2017;  $p=0.0335$  and 2018;  $p=0.0001$ ; Figure 2A).  
219 Similarly, three years, albeit three different years, showed significant differences in  $\delta^{15}\text{N}$   
220 values between tissue types (2013;  $p=0.0003$ , 2014;  $p=0.0001$  and 2017;  $p=0.0001$ ; Figure  
221 2B).

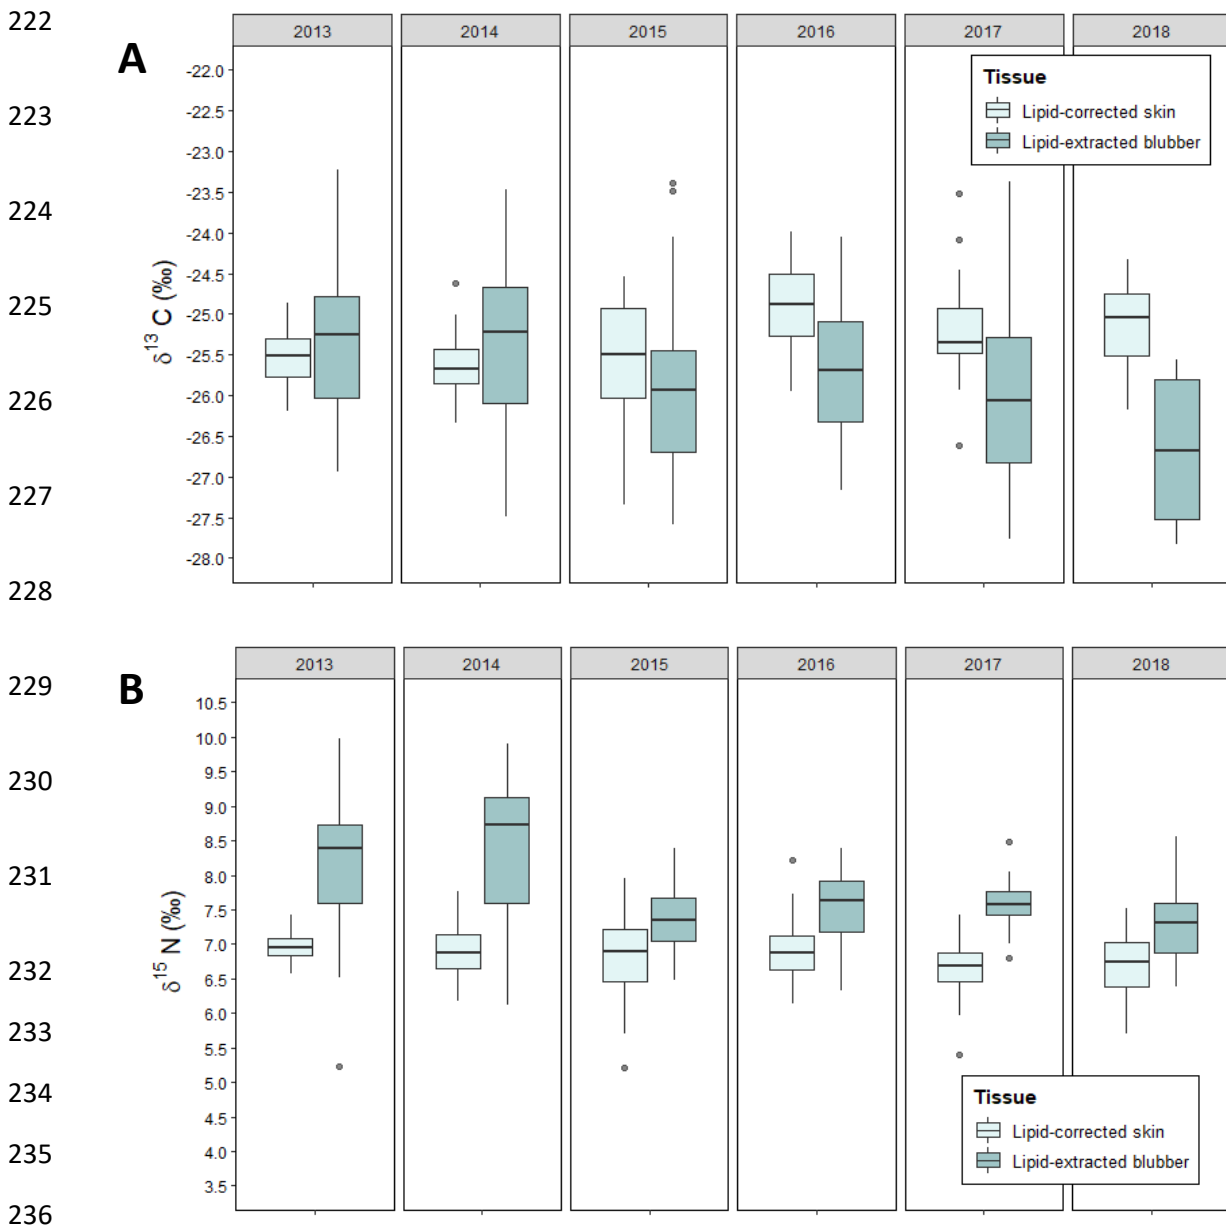

229 **B**  
230  
231  
232  
233  
234  
235  
236  
237 Figure 2: Isotopic values of blubber and skin (n=171) across all sample years. (A) illustrates  
238 comparison between both tissues for  $\delta^{13}\text{C}$  and (B) for  $\delta^{15}\text{N}$  values.

238 As the significant differences in  $\delta^{13}\text{C}$  and  $\delta^{15}\text{N}$  values between lipid-adjusted blubber and  
239 skin did not occur in the same sample years, there may be underlying tissue-specific  
240 variations that could be driving the variability in isotope signatures. Figure 2 illustrates an  
241 overall low variability in both  $\delta^{13}\text{C}$  and  $\delta^{15}\text{N}$  values for lipid-corrected skin across all sample  
242 years, compared to lipid-extracted blubber that has a greater variability with more prominent  
243 oscillations in some years like 2014. The differences in isotopic signatures between the  
244 tissues may lead to issues for interpretation because we cannot be certain whether the  
245 variability present in blubber  $\delta^{13}\text{C}$  and  $\delta^{15}\text{N}$  values is caused by variability in prey type or  
246 foraging location, or whether the observed variability is introduced by endogenous factors or  
247 method artefacts. Hence, we do not know if we lose information about foraging variability  
248 when we just interpret results from skin, or if we introduce variability to results when we just  
249 interpret results from blubber tissue.

### 250 *3.3 Trophic position comparison*

251 Trophic position estimates were calculated to investigate whether the observed differences  
252 between blubber and skin  $\delta^{13}\text{C}$  and  $\delta^{15}\text{N}$  values also leads to differences in the dietary  
253 information derived from the two tissue types. Overall, when samples were considered as a  
254 single cohort, TP did not vary significantly between the two tissues (Wilcoxon  $p=0.988$ ).  
255 The mean TP was  $3 \pm 0.26$  for blubber and  $3 \pm 0.13$  for skin. However, as with single year  
256 cohorts for BSI values, significant differences in tissue-specific TP were found in the years  
257 2013 ( $p=0.0211$ ), 2014 ( $p=0.0113$ ) and 2016 ( $p=0.0218$ ; Figure 3).

258

259

260

261

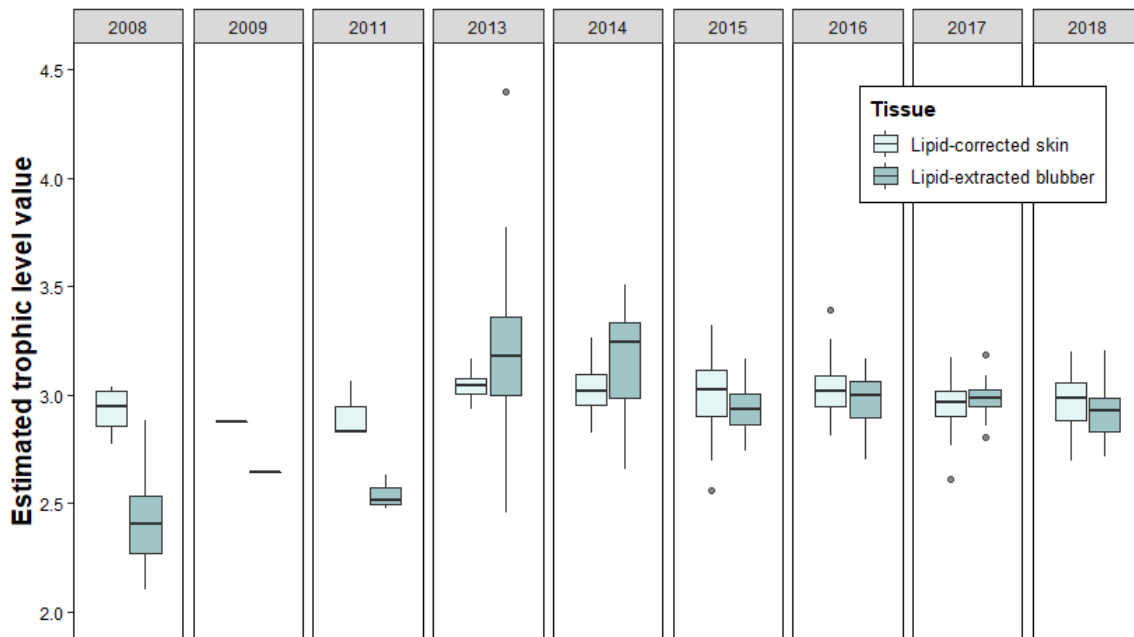

Figure 3: Trophic position estimates for blubber and skin tissue across all sampling years.

262

263 Although there was an overall significant difference in  $\delta^{15}\text{N}$  values between lipid-adjusted blubber  
264 and skin tissue, this difference was not reflected in the TP values calculated for both tissues (TP =  
265 3.0). The calculated TP values are congruent with the classical feeding paradigm of a high-fidelity  
266 krill diet in SHHWs (63–66). However, as some variation was observed in 2013, 2014 and 2016  
267 (Figure 3), there are small, but minor underlying differences that reflect the significant differences  
268 in  $\delta^{15}\text{N}$  values between the two tissues.

269 The equation used to estimate TP has limitations, which can lead to errors in interpretation. First,  
270 the trophic fractionation factors ( $\Delta^{15}\text{N}$ ) used in the equation, 4.45 ‰ for lipid-extracted blubber and  
271 3.61 ‰ for lipid corrected-skin tissue, are only based on estimates. The true TP for E1 humpback  
272 whale tissues are unknown. Additionally,  $\Delta^{15}\text{N}$  vary between and within species and tissues,  
273 introducing error when estimates are based on other tissues or species. Secondly, an average  $\delta^{15}\text{N}$   
274 value for krill was used in the equation, which introduces errors as there are spatial and temporal  
275 differences in  $\delta^{15}\text{N}$  values of krill (67–70). Some introduced uncertainty could be reduced by

276 analysing compound specific nitrogen isotope composition of amino acids (68–70), however we  
277 were unable to analyse compound specific isotopes results due to cost restrains.

### 278 3.4 Tissue-specific krill space

279 The implications of tissue-specific variability in BSI values for the interpretation of diet was  
280 further investigated by creating a krill space (isotope range) for each tissue. The shaded areas  
281 in Figure 4 illustrate the tissue-specific krill space in which SHHW  $\delta^{13}\text{C}$  and  $\delta^{15}\text{N}$  values are  
282 expected to fall if the individual whales were feeding primarily on krill the austral summer  
283 prior to sampling. The figure only shows the  $\delta^{13}\text{C}$  and  $\delta^{15}\text{N}$  values of lipid-adjusted blubber  
284 and skin from two sample years, 2013 and 2015, as these years highlight the two different  
285 scenarios that we have observed between 2008 and 2020; lipid-corrected skin isotope values  
286 fall within the calculated krill space while either the majority of both  $\delta^{13}\text{C}$  and  $\delta^{15}\text{N}$  values of  
287 lipid-extracted blubber fall outside the krill space or the majority of just  $\delta^{13}\text{C}$  values of  
288 blubber fall outside the krill space.

289

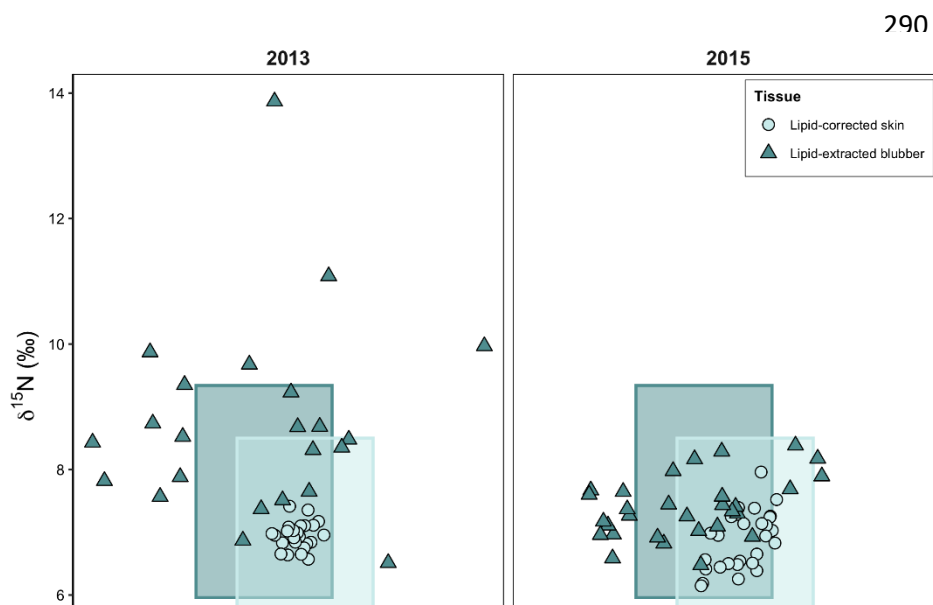

Figure 4: Scatterplot illustrating the tissue-specific krill space for  $\delta^{13}\text{C}$  and  $\delta^{15}\text{N}$  values of lipid-adjusted blubber and skin tissue of 2013 (n=24) and 2015 (n=30).

299 For lipid-extracted blubber, in 2013 only 29.2% and 53.3% of the isotopic data points fell within the  
300 krill space in 2013 and 2015, respectively. This was half of what was observed for lipid-corrected  
301 skin, where 100% of the data fell within the krill space in 2013, and 96.7% in 2015. This leads to  
302 different interpretations about the diet plasticity of SHHW. If we would make inferences based on  
303 skin isotope results, we would conclude that SHHW exclusively feed on krill in the Southern  
304 Ocean. However, if we would only interpret blubber isotope results, we would conclude that  
305 SHHW exhibit a much greater diet plasticity than expected for a high-fidelity krill diet species.  
306 Interestingly, the observed variability does not translate into different interpretations of TP.

### 307 *3.5 Factors influencing variability*

#### 308 **3.5.1 Endogenous factors**

309 To properly interpret stable isotope signatures of animal tissues, it is essential to account for  
310 temporal dynamics of isotopic integration such as tissue turn-over rate and diet-tissue  
311 incorporation.

312 Isotopic turnover time describes the time it takes for a tissue layer to be replaced entirely by a  
313 new layer of tissue (71,72). It is an important consideration when assessing different tissues  
314 as isotopic incorporation occurs during tissue growth, resynthesis and breakdown, and can  
315 vary among tissue types (47,73). The turnover time for blubber and skin of SHHW is  
316 unknown, however SHHW blubber turnover is suggested to be <9 months, because the  
317 blubber lipid store is almost entirely depleted over the course of their annual migration, due  
318 to prolonged fasting (66). Isotopic turnover time for skin  $\delta^{15}\text{N}$  has been estimated to be  
319 approximately 180 days for bottlenose dolphins (*Tursiops truncatus*) and 163 days for blue  
320 whales (*Balaenoptera musculus*), while  $\delta^{13}\text{C}$  has been estimated to be approximately 104  
321 days for bottlenose dolphins (74,75). Based on taxonomy and size, we therefore expect  
322 SHHW skin to have an isotopic turnover time that ranges from approximately 104 to 180  
323 days. In the present study, there were roughly 60 days between E1 humpback whales leaving

324 their Antarctic feeding grounds in March and the time they were sampled in June/ July, and  
325 roughly 150 days until they were sampled in September/ October. Although, turnover time  
326 for either SHHW tissue is unknown, we can assume that both tissues reflect a similar diet  
327 intake timeframe based on available information.

328 Aside from tissue turnover differences, the variation in  $\delta^{13}\text{C}$  and  $\delta^{15}\text{N}$  values between lipid-  
329 adjusted skin and blubber tissues may be linked to differences in tissue-specific metabolic  
330 routing, which is expected to produce a consistent offset between the stable isotope values of  
331 individual tissues. Metabolic routing of different biomolecules during tissue synthesis and  
332 metabolism impacts diet-tissue isotope discrimination. This means that some tissues may  
333 primarily reflect individual diet components such as carbohydrates and lipids derived from  
334 one dietary source and proteins derived from another (76,77). By way of example, a study by  
335 Misra et al. (2019) on bottlenose dolphins found that blubber tissue likely represents  
336 metabolic patterns linked to fatty acids and ketogenic amino acids related to fat synthesis and  
337 deposition within the tissue, whilst skin showed metabolites involved in gluconeogenic  
338 pathways pointing to active anabolic energy-generating metabolism. By extension, it is  
339 possible that the  $\delta^{13}\text{C}$  and  $\delta^{15}\text{N}$  values of SHHW blubber tissue may be drawn from a more  
340 direct energy pool, where lipids are immediately stored in the blubber, while secondary  
341 pathways may be involved in the growth of skin tissue. The complexity of tissue-specific  
342 metabolic routing and discrimination can also lead to uncertainty in lipid normalization  
343 models due to unknown protein-lipid discrimination values.

344

### 345 **3.5.2 Artefacts**

346 In addition to endogenous factors, methodological artefacts should also be considered as a  
347 source of variation. The observed differences between both tissues may be related to the



348 lipid-adjustment approaches applied to the respective tissue type. The mass-balance  
349 mathematical lipid correction model proposed by Fry (2002) relies on precision, accuracy and  
350 reliability in predicting the lipid-free  $\delta^{13}\text{C}$  values. The model is based on C:N ratios and thus  
351 lipid content, which was estimated to have a mean standard error of  $\sim 0.05$  in predicting lipid-  
352 free  $\delta^{13}\text{C}$  values for skin tissue of E1 humpback whales (3). A study by Groß et al. (2021)  
353 specifically calculated the discrimination value 'D' for skin tissue of individual E1 humpback  
354 whales to be applied in the mass balance correction model, which gave a 'D' value of 8.92 ‰  
355 and a  $\text{C:N}_{\text{LM}}$  of 3.1. The authors recommended the use of these values in conjunction with the  
356 mass balance model for E1 humpback whale skin tissue, if the skin tissue has a low lipid  
357 content, leading to small lipid corrections that limit errors in interpretation. However, the use  
358 of these exact coefficient values for 'D' and  $\text{C:N}_{\text{LM}}$  increases uncertainty if the correction is  
359 applied to species and populations where empirical values are unknown. Thus, although the  
360 'D' value has been determined for E1 humpback whales, the accuracy of the value is  
361 unknown, given the large interannual variability in  $\delta^{13}\text{C}$  and  $\delta^{15}\text{N}$  values (e.g. Bengtson Nash  
362 et al., 2017; McConnaughey and McRoy, 1979; Tieszen et al., 1983).

363 As with mathematical lipid correction, solvent-extraction may be similarly susceptible to the  
364 introduction of methodological artefacts. The dichloromethane/methanol solvent combination  
365 used in this study has been reported to have little influence on  $\delta^{15}\text{N}$  values (80). However,  
366 previous studies using various solvent combinations for lipid extraction have detected  
367 fluctuations in  $\delta^{15}\text{N}$  values as a result of solvents interfering with structural components of  
368 the tissue (54,81,82). This could be linked to the high  $\delta^{15}\text{N}$  values found in this study where  
369 23% of all lipid-extracted blubber  $\delta^{15}\text{N}$  data falls outside the 95% confidence interval. In  
370 addition, all figures indicate a high variability and range in lipid-extracted blubber tissue. An  
371 increase in  $\delta^{15}\text{N}$  resulting from solvent lipid extractions has been linked to the loss of  
372 nitrogenous components such as amino acids (AA), which may be extracted unintentionally

373 from the tissue as the solvents can remove polar and non-polar compounds in the process  
374 (83). The hypothesis is that methanol, which removes mostly polar structural fat components  
375 that are attached to proteins, also removes amino acids at the same time as structural fats,  
376 resulting in enrichment of  $^{15}\text{N}$  (Sotiropoulos et al., 2004 and references therein). Although  
377 this study did not seek to address this method component, altered  $\delta^{15}\text{N}$  values post extraction  
378 have previously been observed in fish tissues; muscle and whole body samples (84), and liver  
379 tissues (80). A study by Ryan et al. (2012) found significant increases in  $\delta^{15}\text{N}$  values post  
380 lipid extraction for blubber of fin whales and skin of minke whales (*Balaenoptera*  
381 *acutorostrata*), where the overall changes were more prominent in blubber than skin tissue,  
382 which is logical given the respective lipid proportions. Thus, we hypothesize that E1  
383 humpback whale blubber, being an adipose tissue with high lipid content is susceptible to  
384 solvent extraction related removal of amino acids resulting in the possibility of distorting the  
385 signal of  $\delta^{15}\text{N}$  values in BSIA.

#### 386 **4. Conclusion**

387 This study showed that the overall comparison of lipid adjusted blubber and skin  $\delta^{13}\text{C}$  and  
388  $\delta^{15}\text{N}$  values of SHHW were similar, but not to the extent that we can confidently recommend  
389 the interchangeable use of both tissues in this field of research. Although the mean trophic  
390 position of each year cohort was similar, the greater variability observed in blubber, which  
391 may be interpreted as higher trophic level feeding, is not present in skin values. This  
392 variability has been related to variation in lipid content, solvent interference, isotopic  
393 discrimination, and metabolic pathways between blubber and skin tissue. All are key factors  
394 that can impact the interpretation of stable isotope results. We recommend that future studies  
395 incorporate a standard for SHHW blubber and skin tissue, with the application of multiple  
396 lipid standardization approaches. Additionally, we suggest the inclusion of multiple solvent  
397 lipid extraction trials for blubber tissue to determine the potential impact on isotopic

398 signatures. This will allow for optimization of dietary investigation and standardization of  
399 methodologies, which will improve long-term monitoring of SHHWs to provide new insights  
400 into energy utilisation by these populations.

#### 401 **Acknowledgements**

402 This work was funded by a Griffith University Honours Student Grant. June Eggebo thanks the  
403 Centre for Planetary Health and Food Security for her Honours Thesis Write-up Scholarship. The  
404 authors acknowledge the support from the Griffith University Stable Isotope Laboratory staff and the  
405 contributions of field volunteers who assisted with sample collection.

#### 406 **References**

- 407 1. Bengtson Nash SM, Castrillon J, Eisenmann P, Fry B, Shuker JD, Cropp RA, et al. Signals  
408 from the south; humpback whales carry messages of Antarctic sea-ice ecosystem variability.  
409 *Glob Chang Biol* [Internet]. 2017 Apr 1 [cited 2020 Jul 22];24(4):1500–10. Available from:  
410 <http://doi.wiley.com/10.1111/gcb.14035>
- 411 2. Druskat A, Ghosh R, Castrillon J, Bengtson Nash SM. Sex ratios of migrating southern  
412 hemisphere humpback whales: A new sentinel parameter of ecosystem health. 2019 [cited  
413 2020 Jul 27]; Available from: <https://doi.org/10.1016/j.marevres.2019.104749>
- 414 3. Groß J, Fry B, Burford MA, Bengtson Nash S. Assessing the effects of lipid extraction and  
415 lipid correction on stable isotope values ( $\delta^{13}\text{C}$  and  $\delta^{15}\text{N}$ ) of blubber and skin from southern  
416 hemisphere humpback whales. *Rapid Commun Mass Spectrom*. 2021;35(16):1–11.
- 417 4. Waugh CA, Nichols PD, Noad MC, Nash SB. Lipid and fatty acid profiles of migrating  
418 Southern Hemisphere humpback whales *Megaptera novaeangliae*. *Mar Ecol Prog Ser*.  
419 2012;471:271–81.
- 420 5. Castrillon J, Bengtson Nash S. Evaluating cetacean body condition; a review of traditional  
421 approaches and new developments [Internet]. Vol. 10, *Ecology and Evolution*. John Wiley and  
422 Sons Ltd; 2020 [cited 2020 Jul 27]. p. 6144–62. Available from:

- 423 <https://onlinelibrary.wiley.com/doi/full/10.1002/ece3.6301>
- 424 6. Nicol S. Krill, Currents, and Sea Ice: *Euphausia superba* and Its Changing Environment  
425 [Internet]. Vol. 56, BioScience. Oxford Academic; 2006 Feb [cited 2020 Aug 3]. Available  
426 from: [www.biosciencemag.org](http://www.biosciencemag.org)
- 427 7. Hofmann EE, Murphy EJ. Advection, krill, and Antarctic marine ecosystems. *Antarct Sci*.  
428 2004;16(4):487–99.
- 429 8. Stammerjohn S, Massom R, Rind D, Martinson D. Regions of rapid sea ice change: An inter-  
430 hemispheric seasonal comparison. *Geophys Res Lett*. 2012;39(6):1–8.
- 431 9. Kawaguchi S, Ishida A, King R, Raymond B, Waller N, Constable A, et al. Risk maps for  
432 Antarctic krill under projected Southern Ocean acidification. *Nat Clim Chang* [Internet]. 2013  
433 [cited 2020 Aug 3];3(9):843–7. Available from: [www.nature.com/natureclimatechange](http://www.nature.com/natureclimatechange)
- 434 10. Meredith MP, King JC. Rapid climate change in the ocean west of the Antarctic Peninsula  
435 during the second half of the 20th century. *Geophys Res Lett*. 2005;32(19):1–5.
- 436 11. Teschke M, Wendt S, Kawaguchi S, Kramer A, Meyer B. A circadian clock in antarctic krill:  
437 An endogenous timing system governs metabolic output rhythms in the euphausiid species  
438 *Euphausia superba*. *PLoS One*. 2011;6(10).
- 439 12. Meyer B, Teschke M. Physiology of *Euphausia superba* [Internet]. Volume 1. Siegel V, editor.  
440 Kiel, Germany: Springer; 2016. 145–174 p. Available from:  
441 <http://www.springer.com/series/10290>
- 442 13. Reilly S, Hedley S, Borberg J, Hewitt R, Thiele D, Watkins J, et al. Biomass and energy  
443 transfer to baleen whales in the South Atlantic sector of the Southern Ocean. *Deep Sea Res*  
444 *Part II Top Stud Oceanogr*. 2004;51(12–13):1397–409.
- 445 14. Ware C, Wiley DN, Friedlaender AS, Weinrich M, Hazen EL, Bocconcelli A, et al. Bottom  
446 side-roll feeding by humpback whales (*Megaptera novaeangliae*) in the southern Gulf of  
447 Maine, U.S.A. *Mar Mammal Sci*. 2014;30(2):494–511.

- 448 15. Watt CA, Ferguson SH. Fatty acids and stable isotopes ( $\delta^{13}\text{C}$  and  $\delta^{15}\text{N}$ ) reveal temporal  
449 changes in narwhal (*Monodon monoceros*) diet linked to migration patterns. *Mar Mammal*  
450 *Sci* [Internet]. 2015 Jan 1 [cited 2020 Aug 28];31(1):21–44. Available from:  
451 <http://doi.wiley.com/10.1111/mms.12131>
- 452 16. Bridge ES, Kelly JF, Xiao X, Takekawa JY, Hill NJ, Yamage M, et al. Bird migration and  
453 avian influenza: A comparison of hydrogen stable isotopes and satellite tracking methods. *Ecol*  
454 *Indic*. 2014 Oct 1;45:266–73.
- 455 17. Robillard A, Gauthier G, Therrien J-F, Fitzgerald G, Provencher JF, Bêty J. Variability in  
456 stable isotopes of snowy owl feathers and contribution of marine resources to their winter diet.  
457 *J Avian Biol* [Internet]. 2017 Jun 1 [cited 2020 Aug 28];48(6):759–69. Available from:  
458 <http://doi.wiley.com/10.1111/jav.01257>
- 459 18. Kaczensky P, Šturm MB, Sablin M V, Voigt CC, Smith S, Ganbaatar O, et al. Stable isotopes  
460 reveal diet shift from pre-extinction to reintroduced Przewalski’s horses. *Nature* [Internet].  
461 2017 [cited 2020 Aug 28];7(5950). Available from: [www.nature.com/scientificreports/](http://www.nature.com/scientificreports/)
- 462 19. Chiaradia A, Ramírez F, Forero MG, Hobson KA. Stable Isotopes ( $\delta^{13}\text{C}$ ,  $\delta^{15}\text{N}$ ) Combined  
463 with Conventional Dietary Approaches Reveal Plasticity in Central-Place Foraging Behavior  
464 of Little Penguins *Eudyptula minor*. *Front Ecol Evol* [Internet]. 2016 Jan 11 [cited 2020 Aug  
465 28];3(JAN):154. Available from:  
466 <http://journal.frontiersin.org/Article/10.3389/fevo.2015.00154/abstract>
- 467 20. Borrell A, Gómez-Campos E, Aguilar A. Influence of Reproduction on Stable-Isotope Ratios:  
468 Nitrogen and Carbon Isotope Discrimination between Mothers, Fetuses, and Milk in the Fin  
469 Whale, a Capital Breeder. *Physiol Biochem Zool* [Internet]. 2016 Jan 1 [cited 2020 Aug  
470 28];89(1):41–50. Available from: <https://www.journals.uchicago.edu/doi/10.1086/684632>
- 471 21. Pethybridge H, Choy CA, Logan JM, Allain V, Lorrain A, Bodin N, et al. A global meta-  
472 analysis of marine predator nitrogen stable isotopes: Relationships between trophic structure  
473 and environmental conditions. *Glob Ecol Biogeogr* [Internet]. 2018 Sep 1 [cited 2020 Aug

- 474 28];27(9):1043–55. Available from: <http://doi.wiley.com/10.1111/geb.12763>
- 475 22. Connolly RM, Waltham NJ. Spatial analysis of carbon isotopes reveals seagrass contribution  
476 to fishery food web. *Ecosphere* [Internet]. 2015 Sep 1 [cited 2020 Aug 28];6(9):art148.  
477 Available from: <http://doi.wiley.com/10.1890/ES14-00243.1>
- 478 23. Eisenmann P, Fry B, Holyoake C, Coughran D, Nicol S, Bengtson Nash S. Isotopic evidence  
479 of a wide spectrum of feeding strategies in Southern hemisphere humpback whale baleen  
480 records. *PLoS One*. 2016;11(5):1–20.
- 481 24. Schwarz D, Spitzer SM, Thomas AC, Kohnert CM, Keates TR, Acevedo-Gutiérrez A. Large-  
482 scale molecular diet analysis in a generalist marine mammal reveals male preference for prey  
483 of conservation concern. *Ecol Evol* [Internet]. 2018 Oct 1 [cited 2020 Aug 28];8(19):9889–  
484 905. Available from: <https://onlinelibrary.wiley.com/doi/full/10.1002/ece3.4474>
- 485 25. Acevedo J, Haro D, Dalla Rosa L, Aguayo-Lobo A, Hucke-Gaete R, Secchi E, et al. Evidence  
486 of spatial structuring of eastern South Pacific humpback whale feeding grounds. *Endanger*  
487 *Species Res*. 2013;22(1):33–8.
- 488 26. Witteveen BH, Worthy GAJ, Foy RJ, Wynne KM. Modeling the diet of humpback whales: An  
489 approach using stable carbon and nitrogen isotopes in a Bayesian mixing model. *Mar Mammal*  
490 *Sci*. 2012;28(3):233–50.
- 491 27. Zuev AG, Rozanova OL, Tsurikov SM, Panchenko PL, Ershova MA, Smolyarova DD, et al.  
492 Stable Isotope Trophic Fractionation ( $^{13}\text{C}/^{12}\text{C}$  and  $^{15}\text{N}/^{14}\text{N}$ ) in Mycophagous Diptera Larvae.  
493 *Biol Bull*. 2019;46(5):457–65.
- 494 28. Mill AC, Pinnegar JK, Polunin NVC. Explaining isotope trophic-step fractionation: Why  
495 herbivorous fish are different. *Funct Ecol*. 2007;21(6):1137–45.
- 496 29. Fry B. *Stable isotope ecology*. New York: Springer Science + Business Media, LLC; 2008. 1–  
497 16 p.
- 498 30. DeNiro MJ, Epstein S. Influence of diet on the distribution of carbon isotopes in animals.

- 499 Microw Opt Technol Lett. 1978;42:495–506.
- 500 31. Minagawa M, Wada E. Stepwise enrichment of  $^{15}\text{N}$  along food chains: Further evidence and  
501 the relation between  $\delta^{15}\text{N}$  and animal age. *Geochim Cosmochim Acta*. 1984;48(5):1135–40.
- 502 32. Trites AW. Marine mammal trophic levels and trophic interactions [Internet]. 3rd ed.  
503 Encyclopedia of Ocean Sciences. Elsevier Ltd.; 2019. 589–594 p. Available from:  
504 <http://dx.doi.org/10.1016/B978-0-12-409548-9.11618-5>
- 505 33. Seyboth E, Botta S, Mendes CRB, Negrete J, Dalla Rosa L, Secchi ER. Isotopic evidence of  
506 the effect of warming on the northern Antarctic Peninsula ecosystem. *Deep Res Part II Top*  
507 *Stud Oceanogr* [Internet]. 2018;149(December 2017):218–28. Available from:  
508 <https://doi.org/10.1016/j.dsr2.2017.12.020>
- 509 34. Altabet MA, Francois R. Sedimentary nitrogen isotopic ratio as a recorder for surface ocean  
510 nitrate utilization. *Global Biogeochem Cycles*. 1994;8(1):103–16.
- 511 35. Goericke R, Fry B. Variations of marine plankton in  $\delta^{13}\text{N}$  with latitude, temperature, and  
512 dissolved  $\text{CO}_2$  in the world ocean. *Glob Biochem Cycles*. 1994;8(1):85–90.
- 513 36. Wada E, Terazaki M, Kabaya Y, Nemoto T.  $^{15}\text{N}$  and  $^{13}\text{C}$  abundances in the Antarctic Ocean  
514 with emphasis on the biogeochemical structure of the food web. *Deep Sea Res Part A,*  
515 *Oceanogr Res Pap*. 1987;34(5–6):829–41.
- 516 37. Cherel Y. Isotopic niches of emperor and Adélie penguins in Adélie Land , Antarctica.  
517 2008;813–21.
- 518 38. Hall-Aspland SA, Hall AP, Rogers TL. A new approach to the solution of the linear mixing  
519 model for a single isotope: Application to the case of an opportunistic predator. *Oecologia*.  
520 2005;143(1):143–7.
- 521 39. Hodum PJ, Hobson KA. Trophic relationships among Antarctic fulmarine petrels : insights  
522 into dietary overlap and chick provisioning strategies inferred from stable-isotope (  $\delta^{15}\text{N}$  and  
523  $\delta^{13}\text{C}$ ) analysis. *Mar Ecol Prog Ser*. 2000;198:273–81.

- 524 40. Davenport SR, Bax NJ. A trophic study of a marine ecosystem off southeastern Australia using  
525 stable isotopes of carbon and nitrogen. *Can J Fish Aquat Sci.* 2002;59(3):514–30.
- 526 41. Harris BP, Young JW, Reville AT, Taylor MD. Understanding diel-vertical feeding migrations  
527 in zooplankton using bulk carbon and nitrogen stable isotopes. *J Plankton Res.*  
528 2014;36(4):1159–63.
- 529 42. Hobson KA, Welch HE. Cannibalism and trophic structure in a high Arctic lake: insights from  
530 stable-isotope analysis. *Can J Fish Aquat Sci.* 1995;52(6):1195–201.
- 531 43. Ponsard S, Averbuch P. Should growing and adult animals fed on the same diet show different  
532  $\delta^{15}\text{N}$  values? *Rapid Commun Mass Spectrom.* 1999;13(13):1305–10.
- 533 44. Overman NC, Parrish DL. Stable isotope composition of walleye:  $^{15}\text{N}$  accumulation with age  
534 and area-specific differences in  $\delta^{13}\text{C}$ . *Can J Fish Aquat Sci.* 2001;58(6):1253–60.
- 535 45. Vanderklift MA, Ponsard S. Sources of variation in consumer-diet  $\delta^{15}\text{N}$  enrichment: A meta-  
536 analysis. *Oecologia.* 2003;136(2):169–82.
- 537 46. Cherry SG, Derocher AE, Hobson KA, Stirling I, Thiemann GW. Quantifying dietary  
538 pathways of proteins and lipids to tissues of a marine predator. *J Appl Ecol.* 2011;48(2):373–  
539 81.
- 540 47. Tieszen LL, Boutton TW, Tesdahl KG, Slade NA. Fractionation and turnover of stable carbon  
541 isotopes in animal tissues: Implications for  $\delta^{13}\text{C}$  analysis of diet. *Oecologia.* 1983;57(1–2):32–  
542 7.
- 543 48. Budge SM, Iverson SJ, Koopman HN. Studying trophic ecology in marine ecosystems using  
544 fatty acids: A primer on analysis and interpretation. *Mar Mammal Sci.* 2006;22(4):759–801.
- 545 49. Noren DP, Mocklin JA. Review of cetacean biopsy techniques: Factors contributing to  
546 successful sample collection and physiological and behavioral impacts. *Mar Mammal Sci.*  
547 2012;28(1):154–99.



- 548 50. Castrillon J, Huston W, Bengtson Nash S. The blubber adipocyte index: A nondestructive  
549 biomarker of adiposity in humpback whales (*Megaptera novaeangliae*). *Ecol Evol*.  
550 2017;7(14):5131–9.
- 551 51. Filatova OA, Witteveen BH, Goncharov AA, Tiunov A V., Goncharova MI, Burdin AM, et al.  
552 The diets of humpback whales (*Megaptera novaeangliae*) on the shelf and oceanic feeding  
553 grounds in the western North Pacific inferred from stable isotope analysis. *Mar Mammal Sci*.  
554 2013;29(3):253–65.
- 555 52. Todd S, Ostrom P, Lien J, Abrajano J. Use of biopsy samples of humpback whale (*Megaptera*  
556 *novaeangliae*) skin for stable isotope ( $\delta^{13}\text{C}$ ) determination. *J Northwest Atl Fish Sci*.  
557 1997;22(December 1997):71–6.
- 558 53. Rolff C, Elmgren R. Use of riverine organic matter in plankton food webs of the Baltic Sea.  
559 *Mar Ecol Prog Ser*. 2000;197:81–101.
- 560 54. Post DM, Layman CA, Arrington DA, Takimoto G, Quattrochi J, Montaña CG. Getting to the  
561 fat of the matter: Models, methods and assumptions for dealing with lipids in stable isotope  
562 analyses. *Oecologia*. 2007;152(1):179–89.
- 563 55. Ryan C, McHugh B, Trueman CN, Harrod C, Berrow SD, O'Connor I. Accounting for the  
564 effects of lipids in stable isotope ( $\delta^{13}\text{C}$  and  $\delta^{15}\text{N}$  values) analysis of skin and blubber of  
565 balaenopterid whales. *Rapid Commun Mass Spectrom*. 2012;26(23):2745–54.
- 566 56. Folch J, Lees M, Sloane Stanley GH. A simple method for the isolation and purification of  
567 total lipides from animal tissues. *J Biol Chem*. 1957;226(1):497–509.
- 568 57. Bligh EG, Dyer WJ. A rapid method of total lipid extraction and purification. *Can J Biochem*  
569 *Physiol*. 1959;37(8).
- 570 58. Pethybridge HR, Parrish CC, Bruce BD, Young JW, Nichols PD. Lipid, fatty acid and energy  
571 density profiles of white sharks: Insights into the feeding ecology and ecophysiology of a  
572 complex top predator. *PLoS One*. 2014;9(5).

- 573 59. Groß J, Fry B, Burford M., Bengtson Nash S. Accounting for lipid interference when  
574 evaluating diet via stable isotope values in skin and blubber of southern hemisphere humpback  
575 whales. (1).
- 576 60. Fry B. Stable isotopic indicators of habitat use by Mississippi River Fish. J North Am Benthol  
577 Soc. 2002;21(4):676–85.
- 578 61. R Core Team. Integrated development for R. [Internet]. Vol. 42, RStudio. Boston, MA:  
579 RStudio PBC; 2020. p. 14. Available from: <https://rstudio.com>
- 580 62. GraphPad S. GraphPad Prism [Internet]. San Diego, California: GraphPad; 2020. Available  
581 from: [www.graphpad.com](http://www.graphpad.com)
- 582 63. Witteveen BH, Worthy GAJ, Wynne KM, Hirons AC, Andrews AG, Markel RW. Trophic  
583 levels of North Pacific Humpback whales (*Megaptera novaeangliae*) through analysis of  
584 stable isotopes: Implications on prey and resource quality. Aquat Mamm. 2011;37(2):101–10.
- 585 64. Haro D, Sabat P, Arreguín-Sánchez F, Neira S, Hernández-Padilla J. Trophic role of the  
586 humpback whale (*Megaptera novaeangliae*) in the feeding area of Magellan Strait, Chile. Ecol  
587 Indic. 2020;109:105796.
- 588 65. Paterson RA, Paterson P, Cato DH. Status of humpback whales, *Megaptera novaeangliae*, in  
589 east Australia at the end of the 20th century. Mem MUSEUM. 2001;2(47):579–86.
- 590 66. Chittleborough RG. Dynamics of two populations of the humpback whale. *Megaptera*  
591 *novaeangliae* (borowski). Mar Freshw Res. 1965;16(1):33–128.
- 592 67. Polito MJ, Reiss CS, Trivelpiece WZ, Patterson WP, Emslie SD. Stable isotopes identify an  
593 ontogenetic niche expansion in Antarctic krill (*Euphausia superba*) from the South Shetland  
594 Islands, Antarctica. Mar Biol. 2013;160(6):1311–23.
- 595 68. Chikaraishi Y, Ogawa NO, Kashiyama Y, Takano Y, Suga H, Tomitani A, et al.  
596 Determination of aquatic food-web structure based on compound-specific nitrogen isotopic  
597 composition of amino acids. Limnol Oceanogr Methods. 2009;7(NOV):740–50.

- 598 69. Chikaraishi Y, Kashiyama Y, Ogawa NO, Kitazato H, Ohkouchi N. Metabolic control of  
599 nitrogen isotope composition of amino acids in macroalgae and gastropods: Implications for  
600 aquatic food web studies. *Mar Ecol Prog Ser.* 2007;342:85–90.
- 601 70. McClelland JW, Montoya JP. Trophic relationships and the nitrogen isotopic composition of  
602 amino acids in plankton. *Ecology.* 2002;83(8):2173–80.
- 603 71. Zilversmith D., Entenman C, Fishler C. On the calculation of “turnover time” and “turnover  
604 rate” from experiments involving the use of labeling agents. *Gen Physiol.* 1942;325–31.
- 605 72. Reiner JM. The study of metabolic turnover rates by means of isotopic tracers: I. Fundamental  
606 relations. *Arch Biochem Biophys.* 1953;46(1):53–79.
- 607 73. Newsome SD, Clementz MT, Koch PL. Using stable isotope biogeochemistry to study marine  
608 mammal ecology. *Mar Mammal Sci.* 2010;26(3):509–72.
- 609 74. Browning NE, Dold C, I-Fan J, Worthy GAJ. Isotope turnover rates and diet-tissue  
610 discrimination in skin of ex situ bottlenose dolphins (*Tursiops truncatus*). *J Exp Biol.*  
611 2014;217(2):214–21.
- 612 75. Busquets-Vass G, Newsome SD, Calambokidis J, Serra-Valente G, Jacobsen JK, Aguíñiga-  
613 García S, et al. Estimating blue whale skin isotopic incorporation rates and baleen growth  
614 rates: Implications for assessing diet and movement patterns in mysticetes. *PLoS One*  
615 [Internet]. 2017 [cited 2020 Aug 28];5(12). Available from:  
616 <https://doi.org/10.1371/journal.pone.0177880>
- 617 76. Wolf N, Newsome SD, Peters J, Fogel ML. Variability in the routing of dietary proteins and  
618 lipids to consumer tissues influences tissue-specific isotopic discrimination. *Rapid Commun*  
619 *Mass Spectrom.* 2015;29(15):1448–56.
- 620 77. Caut S, Angulo E, Courchamp F. Variation in discrimination factors ( $\Delta^{15}\text{N}$  and  $\Delta^{13}\text{C}$ ): The  
621 effect of diet isotopic values and applications for diet reconstruction. *J Appl Ecol.*  
622 2009;46(2):443–53.

- 623 78. Misra BB, Mariel RHI, Ivonne HBG, Emanuel HN, Raúl DG, Cristina CDR. <sup>1</sup>H NMR  
624 metabolomic analysis of skin and blubber of bottlenose dolphins reveal a functional metabolic  
625 dichotomy. *Comp Biochem Physiol - Part D Genomics Proteomics* [Internet].  
626 2019;30(February):25–32. Available from: <https://doi.org/10.1016/j.cbd.2019.02.004>
- 627 79. McConnaughey T, McRoy CP. Food-Web structure and the fractionation of Carbon isotopes in  
628 the bering sea. *Mar Biol.* 1979;53(3):257–62.
- 629 80. Logan JM, Lutcavage ME. A comparison of carbon and nitrogen stable isotope ratios of fish  
630 tissues following lipid extractions with non-polar and traditional chloroform/methanol solvent  
631 systems. *Rapid Commun Mass Spectrom.* 2008;22:1081–6.
- 632 81. Sotiropoulos MA, Tonn WM, Wassenaar LI. Effects of lipid extraction on stable carbon and  
633 nitrogen isotope analyses of fish tissues: Potential consequences for food web studies. *Ecol*  
634 *Freshw Fish.* 2004;13(3):155–60.
- 635 82. Yurkowski DJ, Hussey NE, Semeniuk C, Ferguson SH, Fisk AT. Effects of lipid extraction  
636 and the utility of lipid normalization models on  $\delta^{13}\text{C}$  and  $\delta^{15}\text{N}$  values in Arctic marine mammal  
637 tissues. *Polar Biol.* 2015;38(2):131–43.
- 638 83. Bearhop S, Waldron S, Furness RW. Influence of Lipid and Uric Acid on  $\delta^{13}\text{C}$  and  $\delta^{15}\text{N}$   
639 Values of Avian Blood: Implications for Trophic Studies. *Auk.* 2000;117(2):504–7.
- 640 84. Logan JM, Jardine TD, Miller TJ, Bunn SE, Cunjak RA, Lutcavage ME. Lipid corrections in  
641 carbon and nitrogen stable isotope analyses: Comparison of chemical extraction and modelling  
642 methods. *J Anim Ecol.* 2008;77(4):838–46.
- 643
